# Supplementary material
Source: PubMed Central journal article supplement (PMC5517679)
Supplement: HESR-52-1387-s002.pdf [file HESR-52-1387-s002.pdf]

**Appendix Table 1: Results of Propensity Score Matching**

| <b>Parameter</b>                           | <b>Mean:<br/>Treatment<br/>group</b> | <b>Mean:<br/>Matched<br/>Comparison<br/>group</b> | <b>Mean: All<br/>non-<br/>applicants</b> |
|--------------------------------------------|--------------------------------------|---------------------------------------------------|------------------------------------------|
| <i>Arizona</i>                             |                                      |                                                   |                                          |
| For-profit                                 | 0.76                                 | 0.78                                              | 0.78                                     |
| Chain                                      | 0.71                                 | 0.7                                               | 0.51                                     |
| Medicare occupancy > 25%                   | 0.05                                 | 0.03                                              | 0.23                                     |
| 100 or more beds                           | 0.71                                 | 0.83                                              | 0.66                                     |
| Total nursing hours/resident day           | 3.5                                  | 3.64                                              | 3.83                                     |
| RN nursing hours per resident day          | 0.33                                 | 0.31                                              | 0.36                                     |
| 5-star rating on health inspection surveys | 0.15                                 | 0.08                                              | 0.1                                      |
| <i>Wisconsin</i>                           |                                      |                                                   |                                          |
| For-profit                                 | 0.46                                 | 0.47                                              | 0.50                                     |
| Chain                                      | 0.41                                 | 0.48                                              | 0.46                                     |
| Hospital-based                             | 0.13                                 | 0.07                                              | 0.13                                     |
| 100 or more beds                           | 0.44                                 | 0.37                                              | 0.38                                     |
| Total nursing hours/resident day           | 3.51                                 | 3.51                                              | 3.59                                     |
| 5-star rating on health inspection surveys | 0.14                                 | 0.17                                              | 0.10                                     |

*Source:* Abt Associates Inc., Memorandum to CMS, July 31, 2009.
